# Supplementary material
Source: Springer Nature journal article supplement (https://www.springermedizin.de/resource/supplementary/13058_2011_2848_MOESM17_ESM.pdf/9702724)

**A**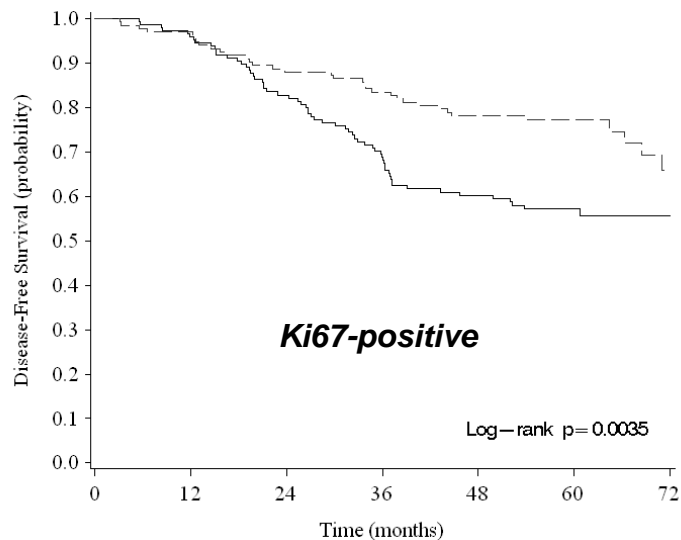

No at risk

|       |     |     |     |     |     |    |    |
|-------|-----|-----|-----|-----|-----|----|----|
| FEC   | 147 | 141 | 119 | 97  | 85  | 43 | 17 |
| FEC-D | 133 | 129 | 117 | 111 | 101 | 54 | 18 |

**B**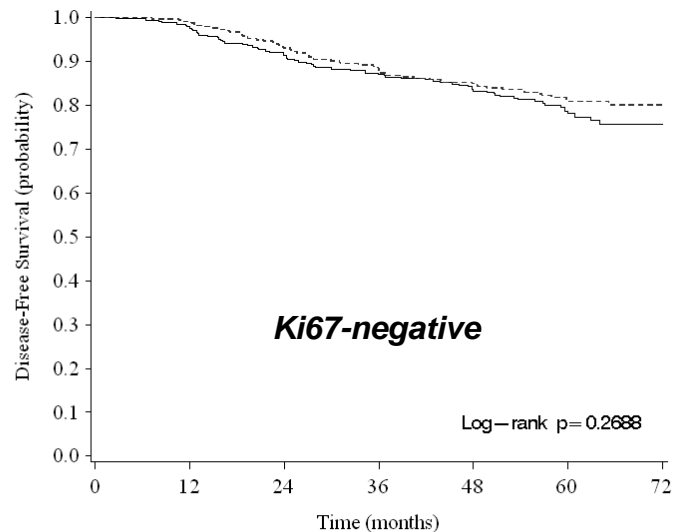

No at risk

|       |     |     |     |     |     |     |    |
|-------|-----|-----|-----|-----|-----|-----|----|
| FEC   | 327 | 318 | 294 | 280 | 264 | 146 | 50 |
| FEC-D | 334 | 331 | 311 | 290 | 272 | 181 | 48 |

Supplement: MOESM17 [file 9702724]
